# Supplementary material for: A perovskite solar cell-TiO2@BiVO4 photoelectrochemical system for direct solar water splitting
Source: Royal Society of Chemistry journal article supplement (doi:10.1039/c5ta05838d), 2015-01-01
Supplement: c5ta05838d1.pdf [file c5ta05838d1.pdf]

1 **Supplementary Information**  
2 **For Journal of Materials Chemistry A**

3  
4  
5 **Perovskite-TiO<sub>2</sub>@BiVO<sub>4</sub> Photoelectrochemical Cells for Unbiased Solar Water**  
6 **Splitting**

7 Xiaofan Zhang<sup>a</sup>, Bingyan Zhang<sup>a</sup>, Kun Cao<sup>a</sup>, Jérémie Brillet<sup>b</sup>, Jianyou Chen<sup>a</sup>,  
8 Mingkui Wang<sup>a</sup> and Yan Shen<sup>a\*</sup>

9 <sup>a</sup> Wuhan National Laboratory for Optoelectronics, Huazhong University of Science  
10 and Technology, Luoyu Road 1037, Wuhan, 430074, P. R. China. \*Corresponding  
11 author. E-mail: [ciac.sheny@mail.hust.edu.cn](mailto:ciac.sheny@mail.hust.edu.cn)

12 <sup>b</sup> Shanghai Institute of Ceramics, Chinese Academy of Sciences, 1295 Dingxi Road,  
13 Shanghai 200050 P. R. China

14  
15 The power conversion efficiency ( $\eta$ ) of the perovskite solar cell is calculated  
16 according to the following formula:

17 
$$\eta(\%) = P_{out}/P_{in} = (FF \times J_{sc} \times V_{oc})/P_{in} \quad (S1)$$

18 where  $P_{in}$  (100 mW cm<sup>-2</sup> herein) and  $P_{out}$  are the incident light intensity and output  
19 power of the solar cell device, FF is the fill factor, and  $J_{sc}$  and  $V_{oc}$  stand for the  
20 short-circuit current density and open-circuit voltage of the solar cell, respectively.

21  
22 The overall solar-to-hydrogen (STH) efficiency of the PV/PEC cell is calculated with  
23 the following equation:

24 
$$STH = \frac{1.23 \times J_{PEC\ cell} \times \eta_F}{P_{in}} \times 100\% \quad (S2)$$

25 where  $J_{PEC\ cell}$  is the maximum photocurrent given by the photoelectrochemical cell,  $\eta_F$   
26 is the Faradic efficiency for the H<sub>2</sub> evolution that can be calculated with the following  
27 equation:

28 
$$\eta_F = \frac{2 \times n_{H_2} \times 96485}{Q_c} \times 100\% \quad (S3)$$

29

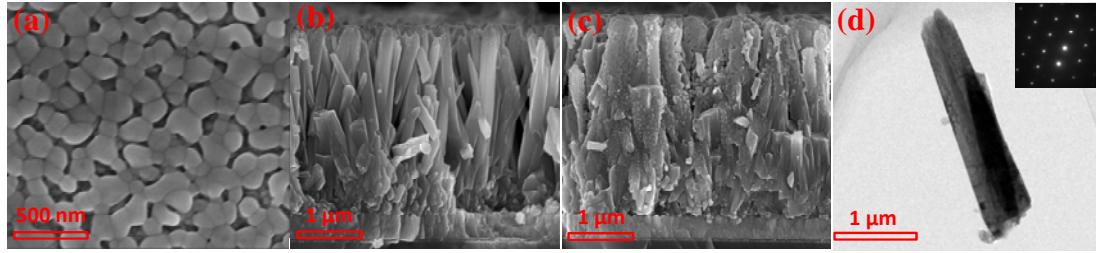

**Fig. S1** The SEM images of BiVO<sub>4</sub> (a), and the cross-section images of TiO<sub>2</sub> NRs (b) and TiO<sub>2</sub>@BiVO<sub>4</sub> heterojunction film (c). (d) TEM image of TiO<sub>2</sub> NRs, the inset is the selected area electron diffraction (SAED) pattern.

The elemental compositions were collected by X-ray photoelectron spectroscopy (XPS, AXIS-ULTRA DLD-600 W, Shimdzu) under ultrahigh vacuum (<10<sup>-8</sup> Torr) and using a monochromatic Al K $\alpha$  X-ray source operating at 150 W. The survey and high-resolution spectra were collected at fixed analyzer pass energies of 160 and 20 eV, respectively. The binding energy shifts were corrected using the C1s level at 284.8 eV as an internal standard, to compensate for the surface-charging effect during data analysis.

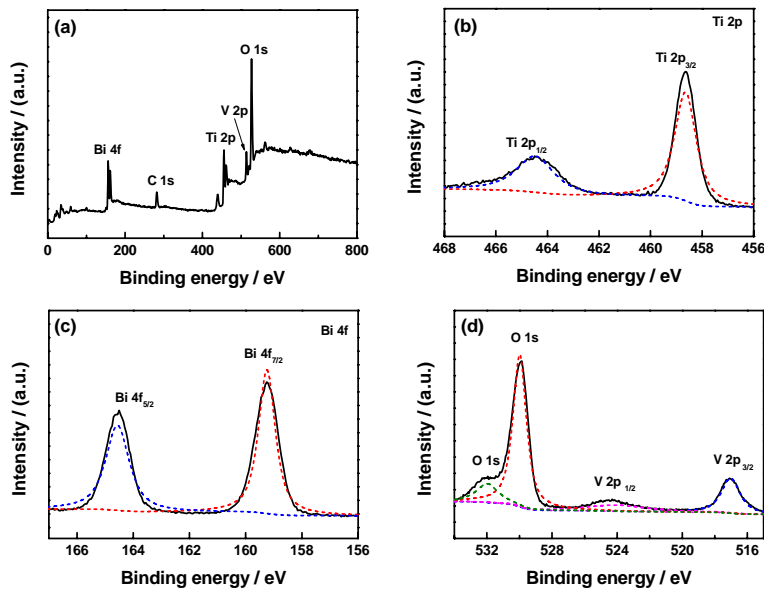

**Fig. S2** XPS spectra of the TiO<sub>2</sub>@BiVO<sub>4</sub> composite film.

1 Fig. S3 exhibits both the characteristic Raman modes of the rutile  $\text{TiO}_2$  and the  
2 monoclinic  $\text{BiVO}_4$ . The mode at  $146\text{ cm}^{-1}$  ( $\text{B}_{1g}$ ),  $443\text{ cm}^{-1}$  ( $\text{E}_g$ ),  $609\text{ cm}^{-1}$  ( $\text{A}_{1g}$ ), and  
3  $243\text{ cm}^{-1}$  ( $\text{E}_g$ ) is the characteristic peak of the rutile  $\text{TiO}_2$ . The strongest peak at  $826\text{ cm}^{-1}$   
4  $\text{cm}^{-1}$  and the shoulder peak at  $717\text{ cm}^{-1}$  are from the anti-symmetric and symmetric  
5 stretching modes of the  $\text{VO}_4$  tetrahedral, respectively. The peaks at  $325\text{ cm}^{-1}$  and  $366\text{ cm}^{-1}$   
6  $\text{cm}^{-1}$  belong to the bending modes of the  $\text{VO}_4$  tetrahedral. The remaining Raman  
7 peaks at  $129\text{ cm}^{-1}$  and  $211\text{ cm}^{-1}$  are attributed to the vibration of the crystal lattice.

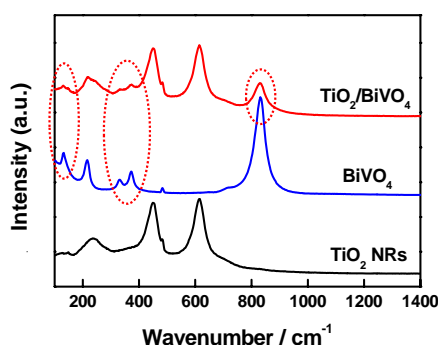

8

9 **Fig. S3** Raman spectrum for  $\text{TiO}_2$  NRs,  $\text{BiVO}_4$  NPs and  $\text{TiO}_2@\text{BiVO}_4$  composite  
10 films.

11

12 The phase purity and crystal structure of the obtained samples were examined by  
13 X-ray diffraction (XRD). The XRD patterns for the  $\text{TiO}_2$  NRs and  $\text{BiVO}_4$  NPs are  
14 displayed in Fig. S4a, corresponding to a pure tetragonal rutile  $\text{TiO}_2$  and monoclinic  
15  $\text{BiVO}_4$  phase, respectively. After deposition of the  $\text{BiVO}_4$ , only rutile  $\text{TiO}_2$  and  
16 monoclinic  $\text{BiVO}_4$  phase are detected in the XRD pattern of  $\text{TiO}_2@\text{BiVO}_4$  composite  
17 film, suggesting that the phase and composition of the  $\text{TiO}_2$  is unchanged after  
18 deposition the  $\text{BiVO}_4$  NPs. Fig. S4b compares the UV-visible absorption of the  
19 samples. The optical band gap can be estimated by dropping a line from the maximum  
20 slope of the Tauc plot ( $\sqrt{\alpha h\nu}$  vs  $h\nu$ ) to the axis (Fig. S4c).<sup>3</sup> Therefore, the band tail  
21 was estimated to be 2.4 and 3.0 eV for the  $\text{BiVO}_4$  NPs and  $\text{TiO}_2$  NRs, respectively.  
22 Compared to the  $\text{TiO}_2$  NRs, the  $\text{TiO}_2@\text{BiVO}_4$  photoanode exhibits an increase in  
23 light absorption intensity in the range from 300 to 500 nm. The broad absorption band

1 from 400 to 500 nm could be attributed to the light absorption of BiVO<sub>4</sub>, which  
 2 remarkably enhances the TiO<sub>2</sub> light absorption ability.

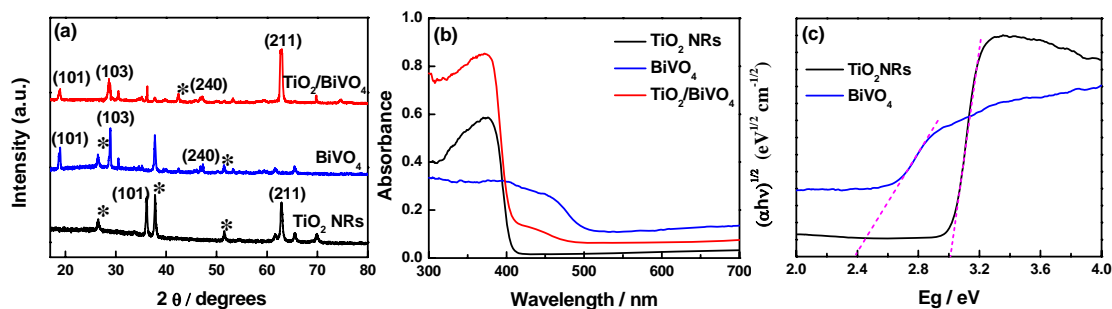

3  
 4 **Fig. S4** (a) XRD patterns of the TiO<sub>2</sub> NRs, BiVO<sub>4</sub> NPs and TiO<sub>2</sub>@BiVO<sub>4</sub> composite  
 5 film. Asterisks (\*) is corresponding to diffraction peaks arising from the FTO  
 6 substrate. (b) UV-vis absorption spectrum for all prepared samples. (c) Tauc plots of  
 7 TiO<sub>2</sub> NRs and BiVO<sub>4</sub> NPs for the band gap calculation.

8

9 **Table S1.** Comparison of various TiO<sub>2</sub>-BiVO<sub>4</sub> photoanodes for PEC water splitting.

| Electrolyte solution                          | Photocurrent density at 1.23 V vs. RHE (mA cm <sup>-2</sup> ) | Reference |
|-----------------------------------------------|---------------------------------------------------------------|-----------|
| 1 M NaOH                                      | 0.2 (visible light)                                           | 1         |
| 0.1 M K <sub>3</sub> PO <sub>4</sub> (pH 8.0) | 0.15 ( full solar spectrum)                                   | 2         |
| 0.1 M PBS (pH 7.0)                            | 1.3 ( full solar spectrum)<br>0.81 (λ>420 nm) <sup>a</sup>    | This work |

10 <sup>a</sup> This photocurrent density is calculated by integrating the measured IPCE (Figure 3b)  
 11 over standard AM 1.5 G spectrum within the region λ>420 nm.

12

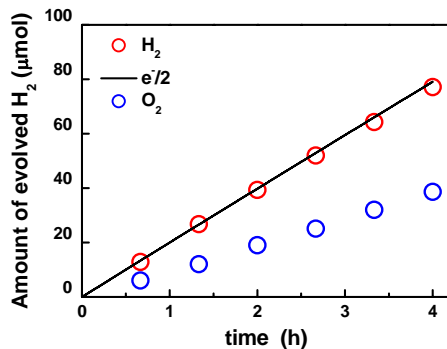

1

2 **Fig. S5** PEC water splitting of the TiO<sub>2</sub>@BiVO<sub>4</sub> photoanode at 1.23 V vs. RHE (the  
 3 theory potential of water decomposition) in three-electrode system under irradiation.  
 4 Black line corresponds to the integration over time of the net photocurrent divided by  
 5 2. Blue and red circles correspond to the evolved O<sub>2</sub> and H<sub>2</sub> gas measured by gas  
 6 chromatography during the experiment, respectively.

7

8 The absorbed photo-to-current efficiency (APCE) was obtained by dividing the  
 9 IPCE by light harvesting efficiency (LHE) at each wavelength using the formula with  
 10 APCE=IPCE/LHE, and the LHE plots of the samples are shown in Fig. 4a. In order to  
 11 explain the fact that more photogenerated holes with my structure can be collected  
 12 than the mesoporous structure, the normalized APCE was obtained (Fig. S6).

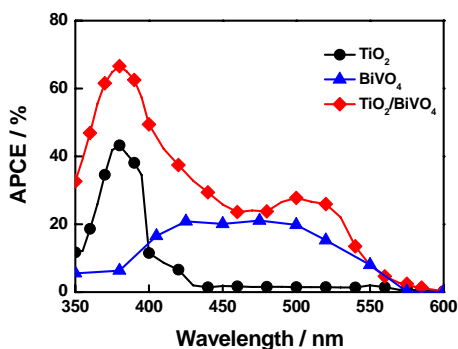

13

14 **Fig. S6** APCE plots of the TiO<sub>2</sub> NRs, BiVO<sub>4</sub> and TiO<sub>2</sub>@BiVO<sub>4</sub> photoanodes.

15

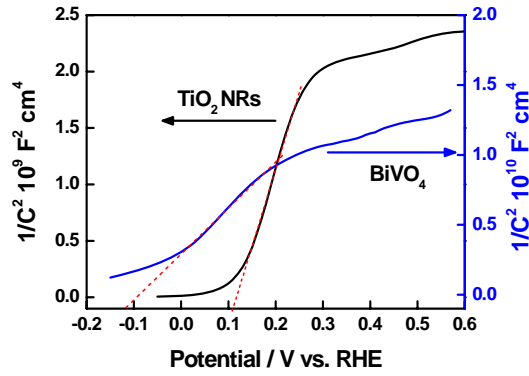

1

2 **Fig. S7** Mott-Schottky plots of the TiO<sub>2</sub> NRs (black line) and BiVO<sub>4</sub> NPs (blue line).

3

4 The applied bias photon-to-current efficiency (ABPE) was calculated from the J-V  
 5 curves obtained from a two-electrode system where  $V_{\text{bias}}$  is the applied bias between  
 6 WE and CE assuming 100% Faradaic efficiency using the following equation,<sup>4</sup>

$$7 \quad \text{ABPE} = \frac{J_p \times (1.23 - |V_{\text{bias}}|)}{P_{\text{in}}} \times 100\% \quad (\text{S4})$$

8 where  $J_p$  is the photocurrent density ( $\text{mA cm}^{-2}$ ),  $V_{\text{bias}}$  is the applied bias between the  
 9 working electrode and counter electrode (V), and  $P_{\text{in}}$  is the incident illumination power  
 10 density (AM 1.5G,  $100 \text{ mW/cm}^2$ ).

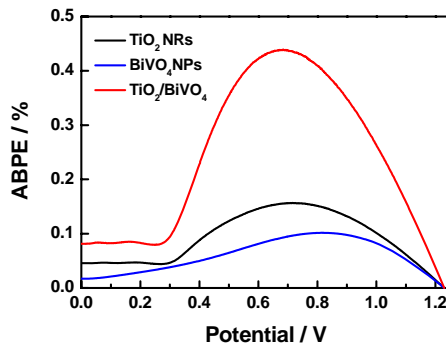

11

12 **Fig. S8** ABPE plots of all photoanodes obtained using a two-electrode system.

13

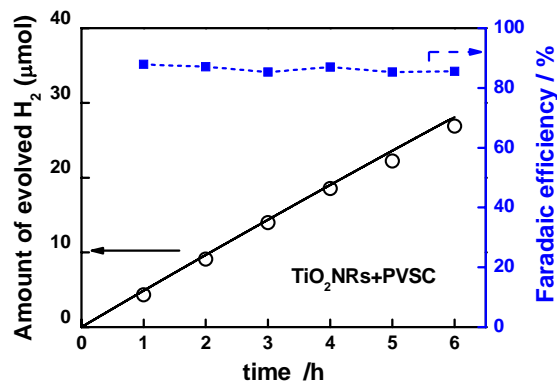

1

2 **Fig. S9** The Faradaic efficiency and quantity of detected hydrogen derived from the  
 3 TiO<sub>2</sub> NRs+PVSC device under irradiation. Black line corresponds to the integration of  
 4 the net photocurrent divided by 2. Black circle corresponds to the H<sub>2</sub> gas measured by  
 5 gas chromatography during the experiment.

6

7 Electrochemical impedance spectroscopy measurement was further performed at  
 8 open circuit potential under AM 1.5G illumination. Fig. S8 presents the typical  
 9 Nyquist plots for various photoanodes. An equivalent circuit model (the inset of Fig.  
 10 S8) was employed to analyze the EIS data, in which  $R_s$  is the resistance of the  
 11 electrolyte,  $C_p$  is the capacitance phase element, and  $R_{ct}$  represents the charge-transfer  
 12 resistance at the photoanode/electrolyte interface where the water oxidation reaction  
 13 occurred.<sup>5</sup> Normally, a decrease of the charge transfer resistance indicates a fast  
 14 interfacial charge transfer process. Here, the TiO<sub>2</sub>@BiVO<sub>4</sub> heterojunction photoanode  
 15 exhibits the smallest charge transfer resistance among the three samples, which  
 16 indicates a more effective separation of photogenerated carriers and faster interfacial  
 17 charge transfer occurring in the TiO<sub>2</sub>@BiVO<sub>4</sub> photoanode. This result is consistent  
 18 with the PEC measurements that the TiO<sub>2</sub>@BiVO<sub>4</sub> sample shows the best PEC water  
 19 oxidation performance.

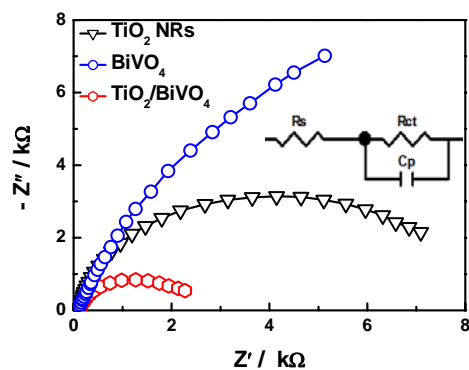

1

2 **Fig. S10** Nyquist EIS plots for all photoanodes at open circuit potential recorded  
 3 under light illumination. The inset is the equivalent circuit model used for fitting the  
 4 experimental data (The solid lines are the fitting results, the circles are the  
 5 experimental results).

6

7

## 8 Reference

- 9 1. M. Xie, X. Fu, L. Jing, P. Luan, Y. Feng, H. Fu, *Adv. Energy Mater.* 2014, **4**,  
 10 1300995.
- 11 2. S. Kimura, S. Moniz, A. Handoko, J. Tang, *J. Mater. Chem. A*, 2014, **2**,  
 12 3948-3953.
- 13 3. X. Zhang, B. Zhang, D. Huang, H. Yuan, M. Wang and Y. Shen, *Carbon*, 2014, **80**,  
 14 591-598.
- 15 4. T. Kim, K. Choi, *Science* 2014, **343**, 990-994.
- 16 5. M. Wang, P. Chen, R. Baker, S. Zakeeruddin and M. Grätzel, *ChemPhysChem*,  
 17 2009, **10**, 290-299.
